# Supplementary material
Source: MDPI journal article supplement (https://www.mdpi.com/2673-4591/37/1/73)

# RSM Process Optimization of Biodiesel Production from Waste Cooking Palm Oil in the Presence of SO<sub>3</sub>H-PSC Catalyst

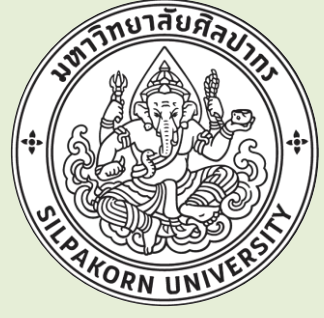

Department of Materials Science and Engineering,  
Faculty of Engineering and Industrial Technology,  
Silpakorn University, Nakhon Pathom 73000, Thailand

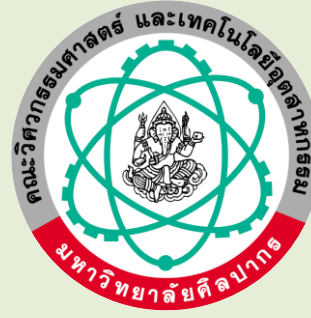

A. Buasri\*, P. Sirikoom, S. Pattane,  
O. Buachum, and V. Loryuenyong

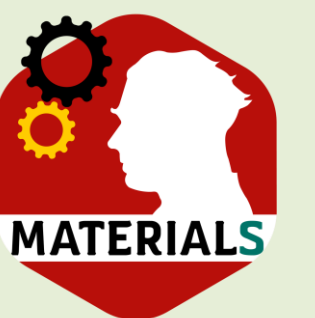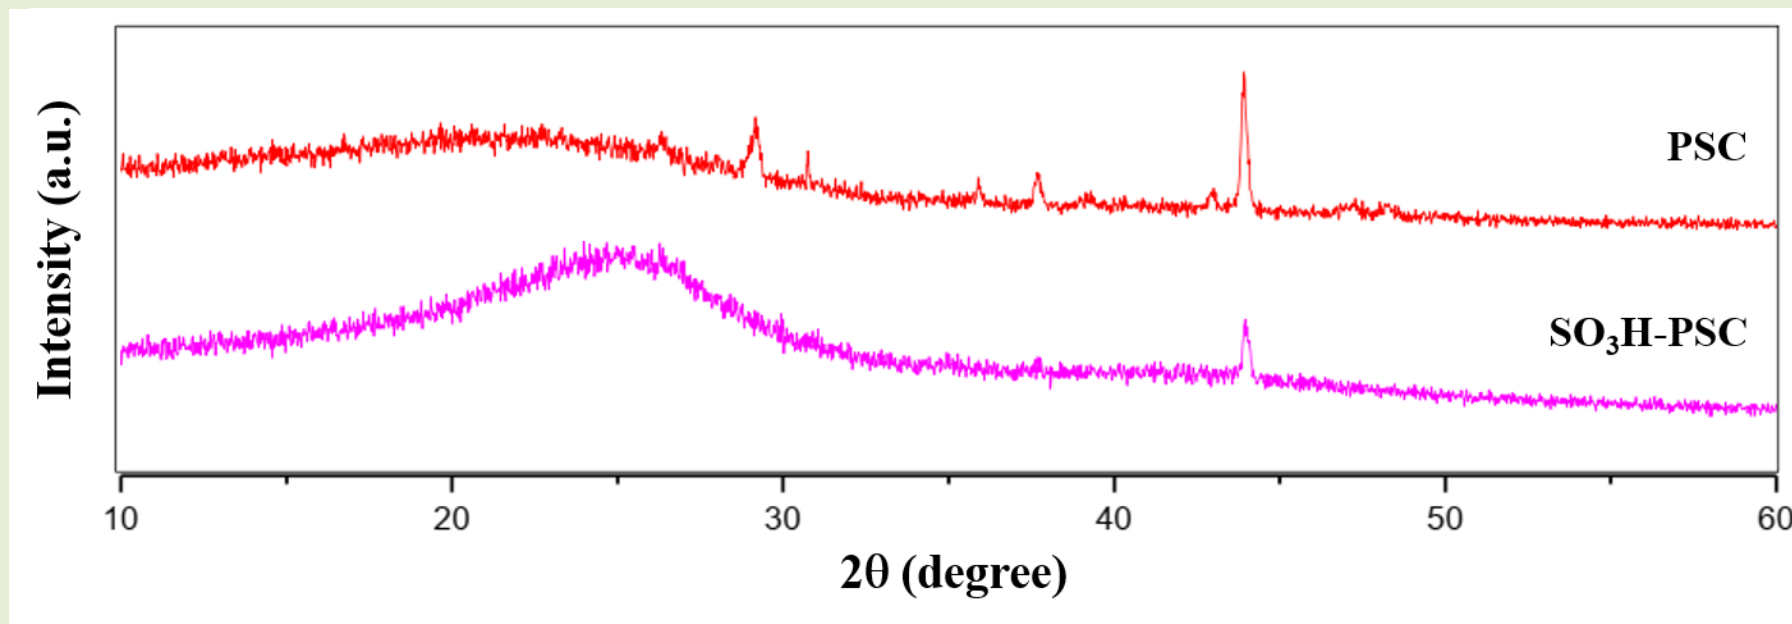

Figure 1. XRD patterns of PSC and SO<sub>3</sub>H-PSC samples.

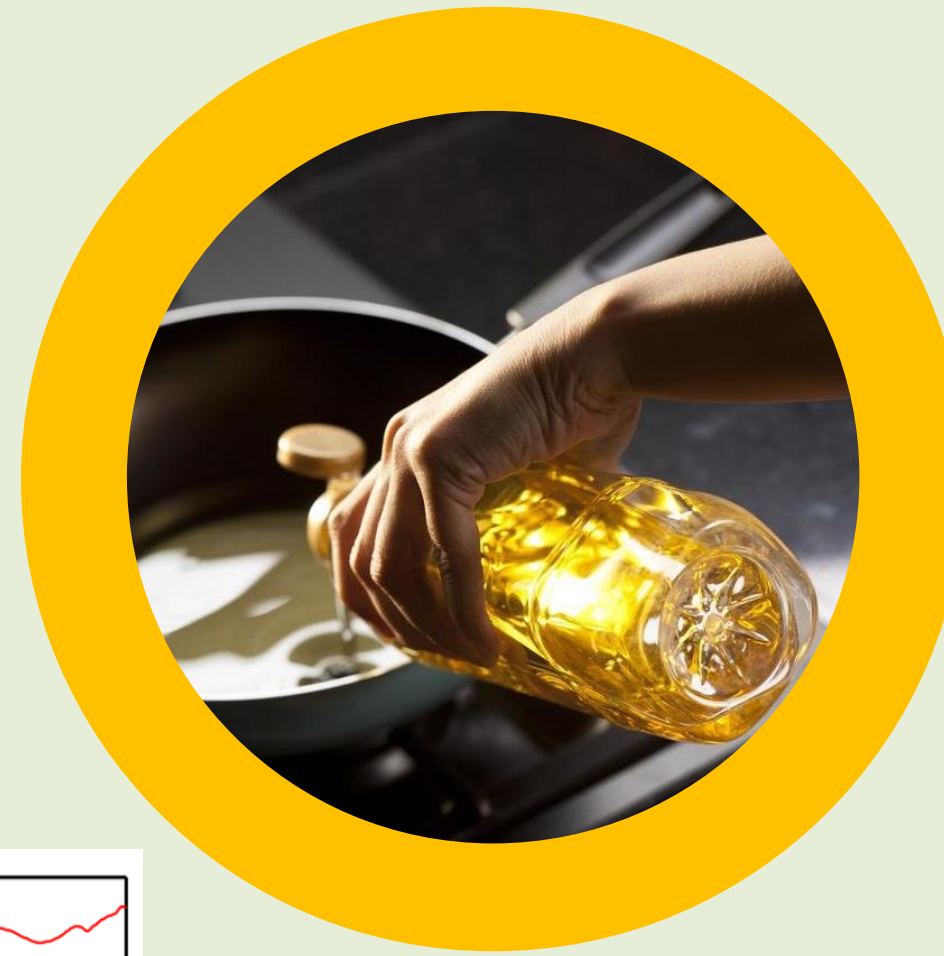

## Objective

The goal of this work is to make the transesterification/esterification of **waste cooking palm oil (WCPO)** more effective by adding a heterogeneous **sulfonated palm seed cake (SO<sub>3</sub>H-PSC) derived catalyst** to the reaction system. The solid acid catalyst was synthesized by calcining of waste **palm seed cake (PSC)** and modified with **zinc chloride (ZnCl<sub>2</sub>)** and **sulfonic acid (SO<sub>3</sub>H)**.

The choice of raw material for **novel catalyst** synthesis provides a promising way of preparing “**green catalyst**” as it comes from renewable biomass and could be biodegraded easily.

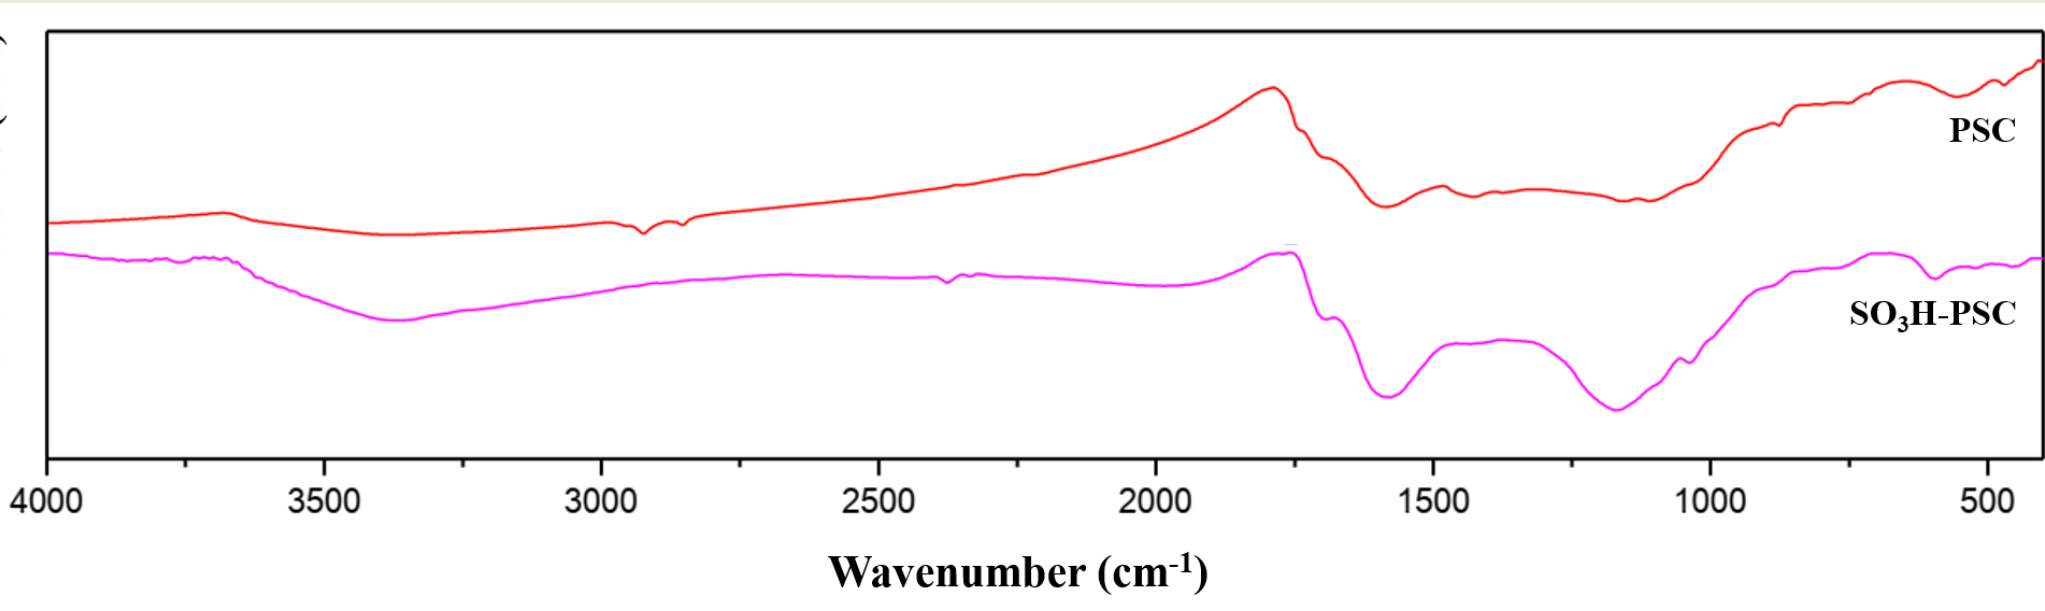

Figure 2. FTIR spectra of PSC and SO<sub>3</sub>H-PSC samples.

## Catalyst Preparation

The **SO<sub>3</sub>H-PSC catalyst** was made from **waste material** so that it could be used as the good and cheap source of **activated carbon (AC)**. The soaked PSC with ZnCl<sub>2</sub> was then transferred and calcined with tube furnace in N<sub>2</sub> atmosphere at 400 °C for 2 h. The sample will be dispersed in the 100 ml sulfonic acid (SO<sub>3</sub>H) and subsequently sonicated for 2 h at 150 °C. Then, the novel catalyst was washed with excess hot distilled water to remove an excess of acid moieties.

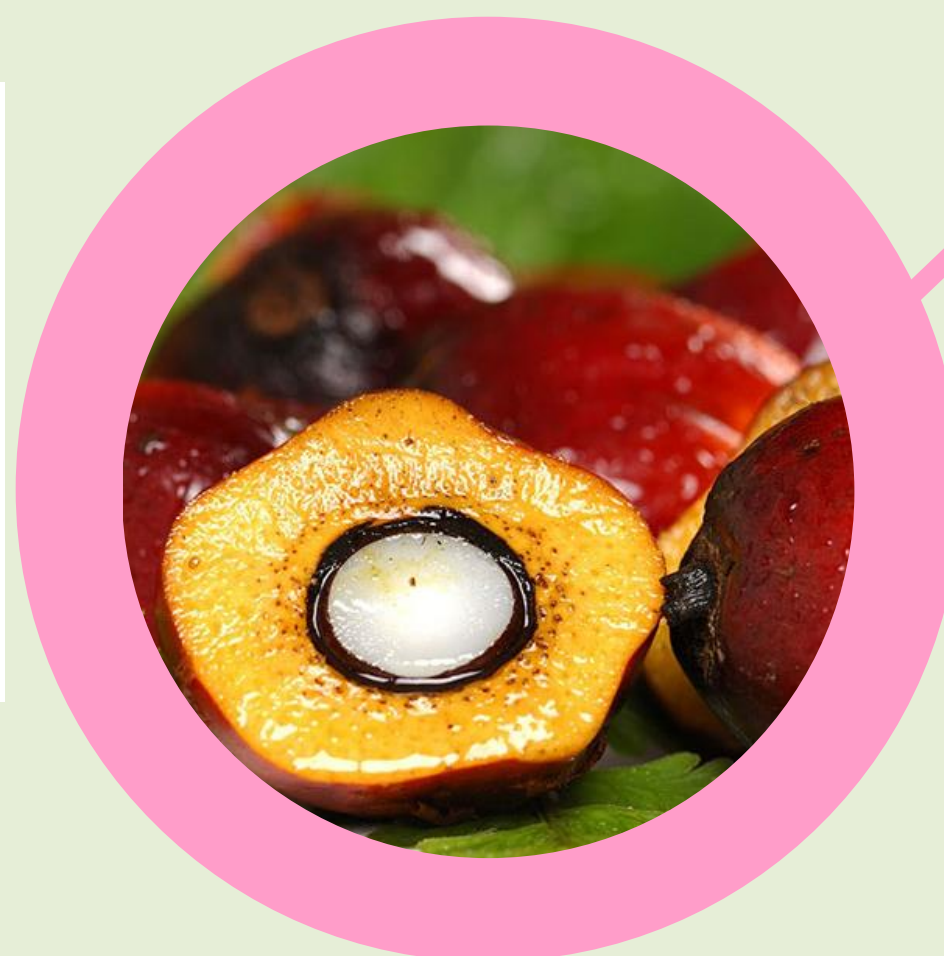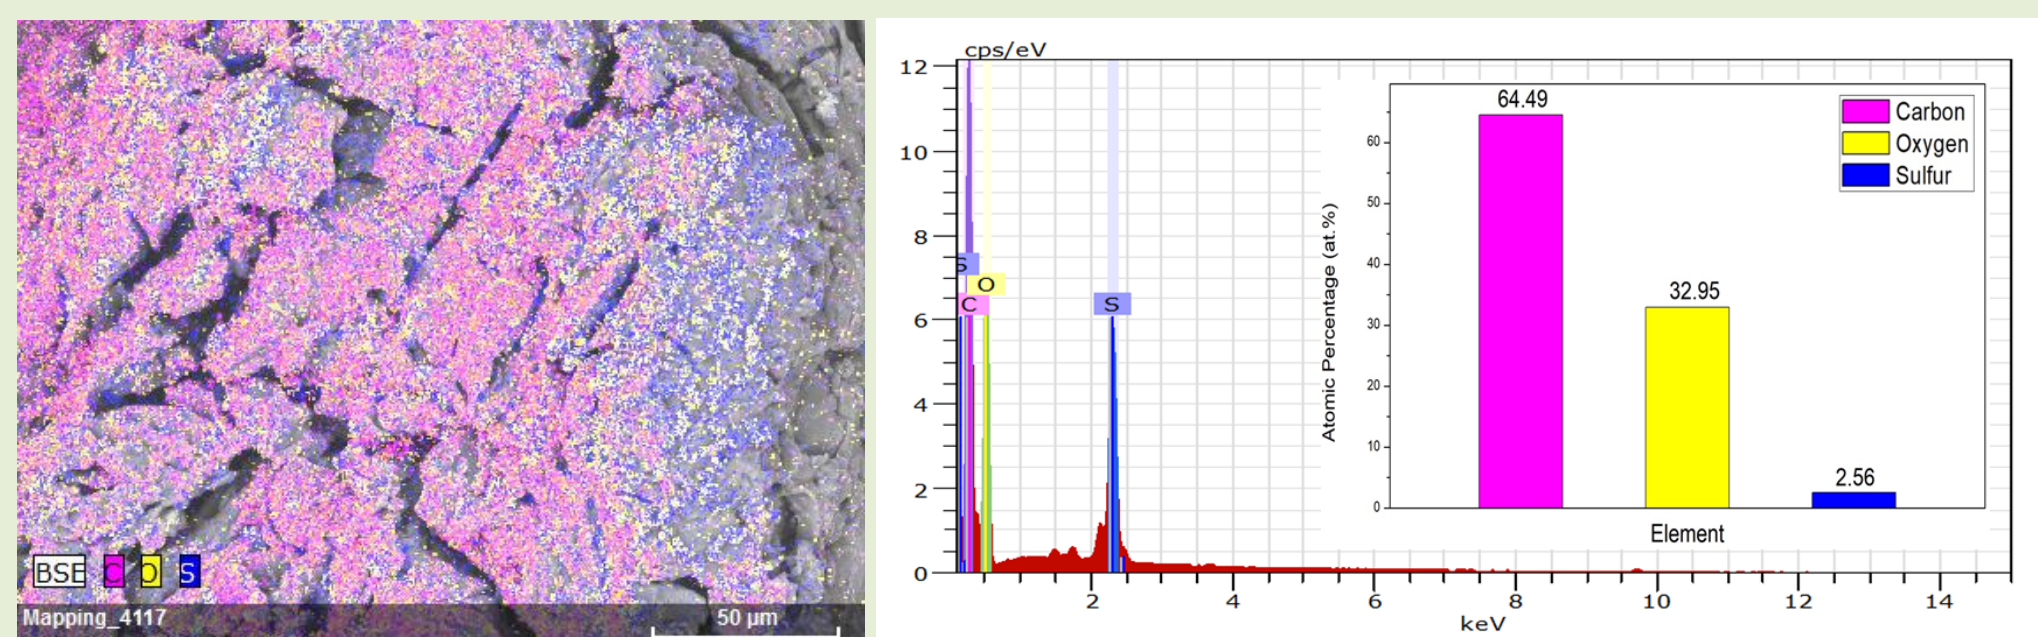

Figure 3. EDS analysis of SO<sub>3</sub>H-PSC catalyst.

## Summary

**Optimized reaction conditions by response surface methodology (RSM) in achieving 98.92% WCPO conversion were identified as the 5.40 wt.% catalyst quantity, 17.35:1 methanol/oil molar ratio, and 8.57 min transesterification time.**

Biodiesel synthesis that employs biological residue and used waste vegetable oil will reduce waste disposal problem and cut the price of biodiesel, making biodiesel a viable fuel alternative compared to petroleum-derived biodiesel.

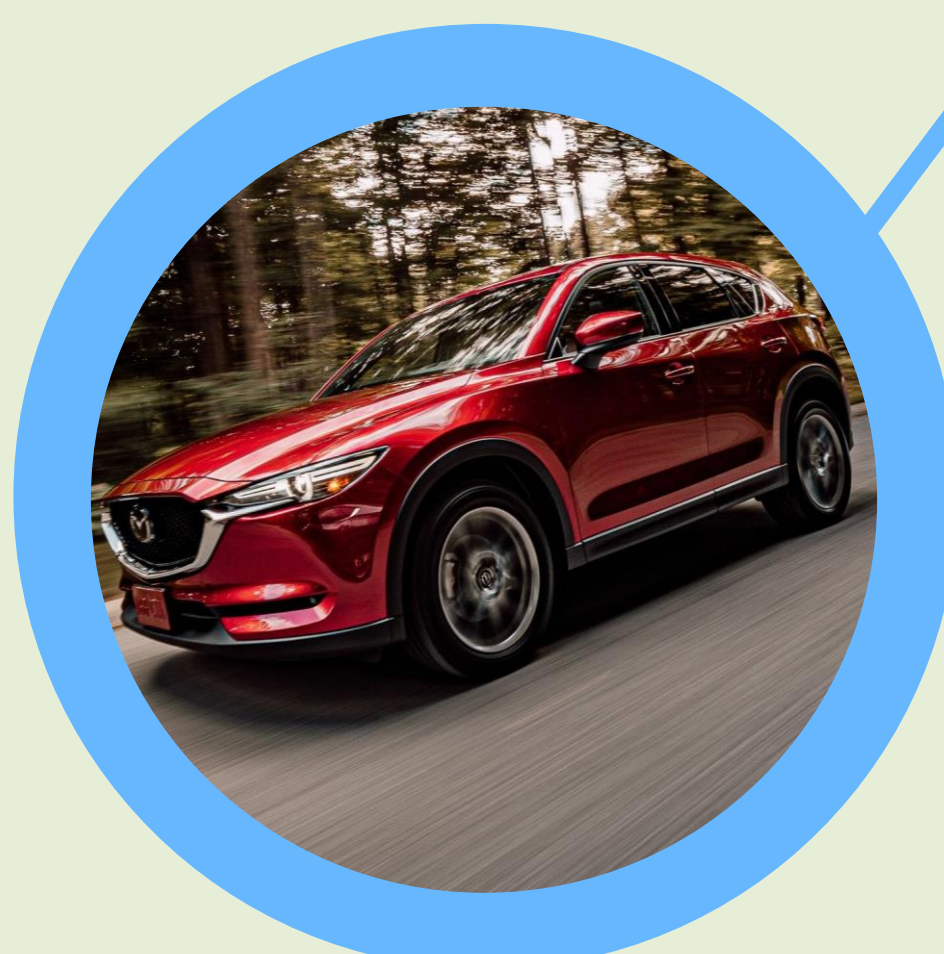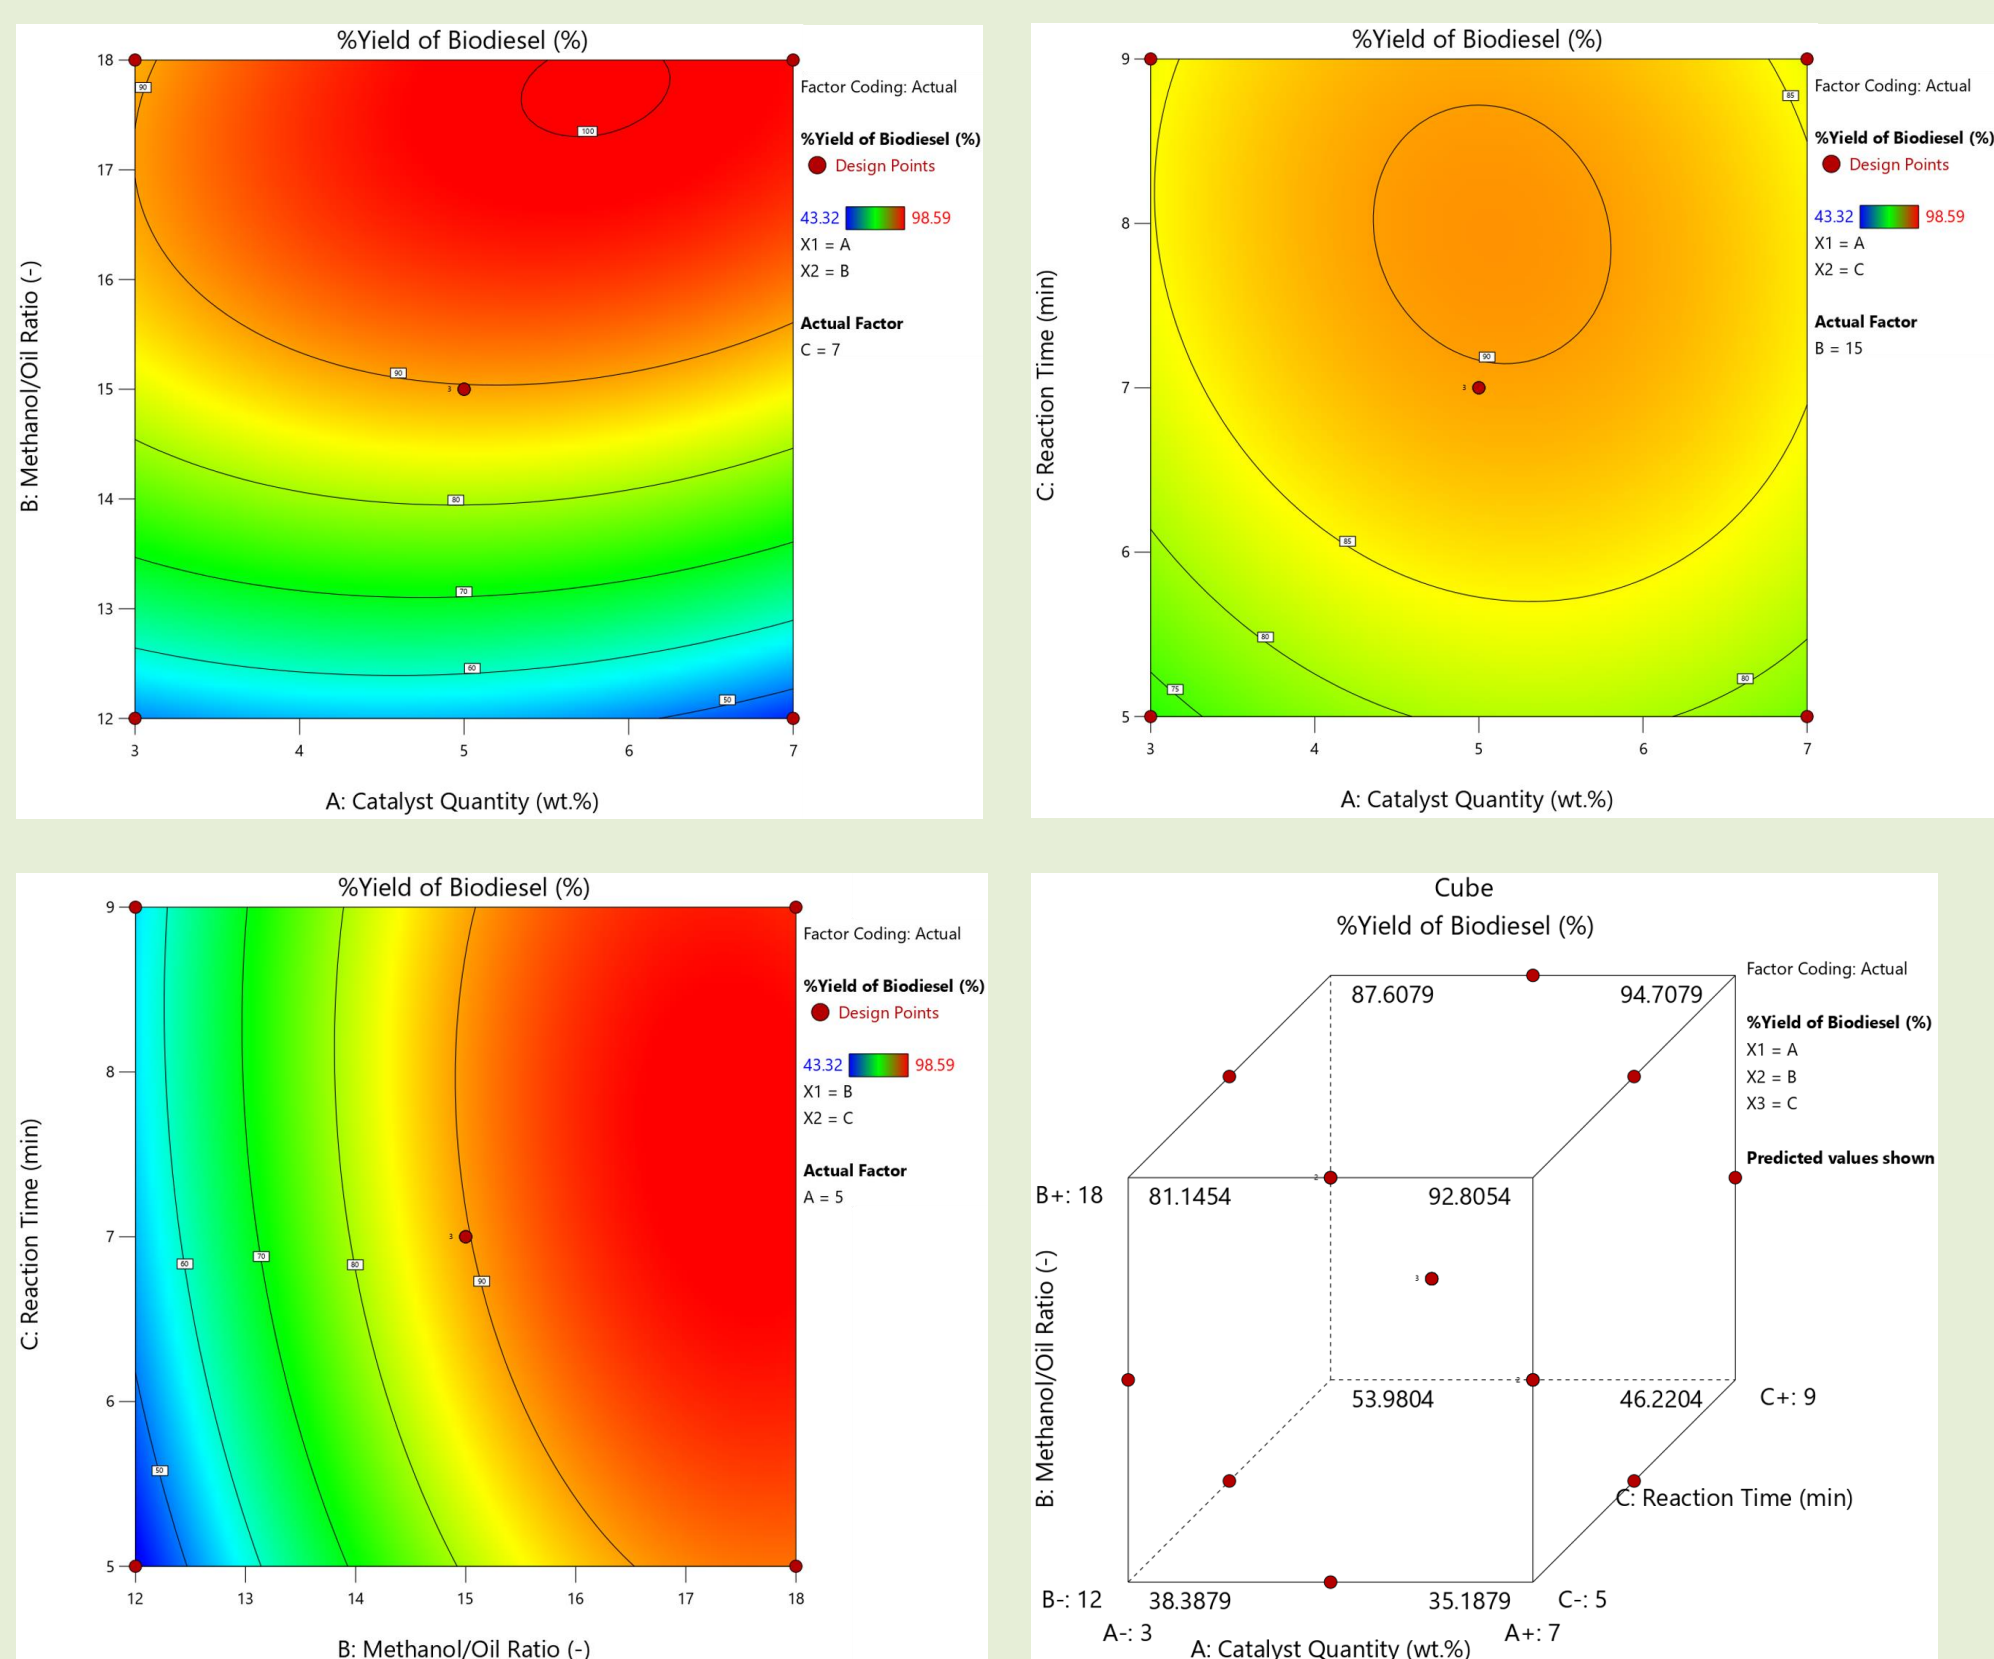

Figure 4. Optimal reaction conditions by contour plots of the catalyst quantity, methanol/oil mole ratio and reaction time, and cubical representation of effects of various parameters on %yield of biodiesel.

Table 1. Factors and levels of process for biodiesel production.

| Factors                               | Levels |    |    |
|---------------------------------------|--------|----|----|
|                                       | -1     | 0  | +1 |
| Catalyst quantity (A), wt.%           | 3      | 5  | 7  |
| Methanol/WCPO mole ratio (B), mol/mol | 12     | 15 | 18 |
| Reaction time (C), min                | 5      | 7  | 9  |

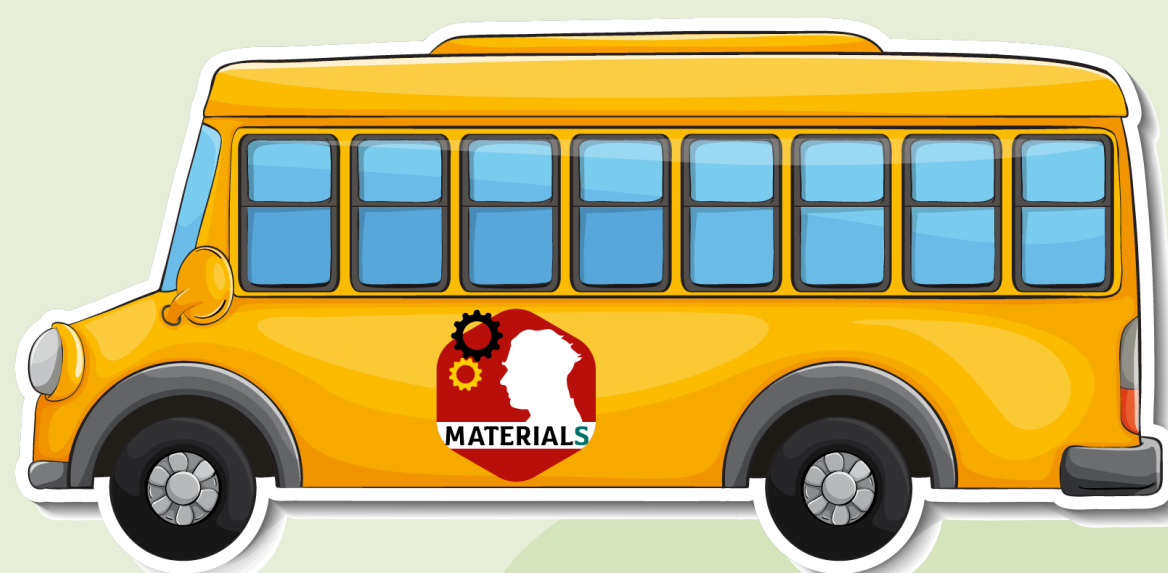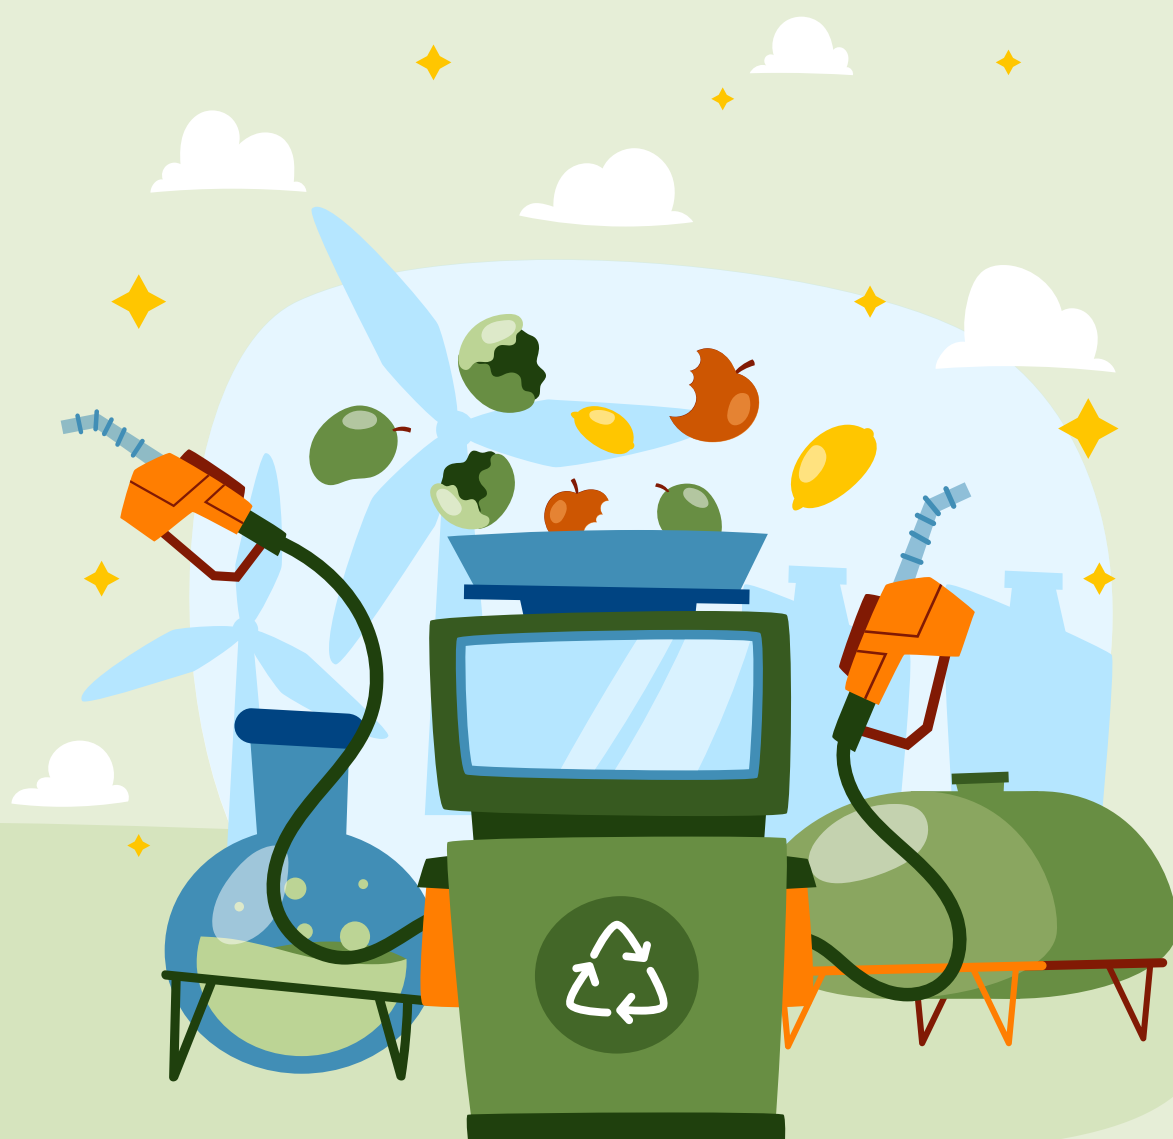

Supplement: s1 [file s1]
